1 **Full Title: Analysis of Cyp51 protein sequences shows 4 major Cyp51 gene**  
2 **family groups across Fungi**

3  
4 **Running Title: 4 Fungal groups of Cyp51 proteins**

5  
6 **Authors**

7 Brandi N Celia-Sanchez<sup>1</sup>, Brandon Mangum<sup>1</sup>, Marin Brewer<sup>2</sup>, Michelle Momany<sup>1\*</sup>

8 **Affiliations**

9 <sup>1</sup> Department of Plant Biology, University of Georgia, Athens, Georgia, United States of  
10 America

11 <sup>2</sup> Department of Plant Pathology, University of Georgia, Athens, Georgia, United States of  
12 America

13 \*Corresponding Author (0000-0001-7110-063X)

14  
15 **Abstract**

16 Azole drugs target fungal sterol biosynthesis and are used to treat millions of human fungal  
17 infections each year. Resistance to azole drugs has emerged in multiple fungal pathogens  
18 including *Candida albicans*, *Cryptococcus neoformans*, *Histoplasma capsulatum*, and  
19 *Aspergillus fumigatus*. The most well-studied resistance mechanism in *A. fumigatus* arises from  
20 missense mutations in the coding sequence combined with a tandem repeat in the promoter of  
21 *cyp51A*, which encodes a cytochrome P450 enzyme in the fungal sterol biosynthesis pathway.  
22 Filamentous members of Ascomycota such as *A. fumigatus* have either one or two of three  
23 Cyp51 paralogs (Cyp51A, Cyp51B, and Cyp51C). Most previous research in *A. fumigatus* has  
24 focused on Cyp51A due to its role in azole resistance. We used the *A. fumigatus* Cyp51A protein  
25 sequence as the query in database searches to identify Cyp51 proteins across Fungi. We found  
26 435 Cyp51 proteins in 301 species spanning from early-diverging fungi (Blastocladiomycota,  
27 Chytridiomycota, Zoopagomycota and Mucormycota) to late-diverging fungi (Ascomycota and  
28 Basidiomycota). We found these sequences formed 4 major Cyp51 groups: Cyp51, Cyp51A,  
29 Cyp51B, and Cyp51C. Surprisingly, we found all filamentous Ascomycota had a Cyp51B  
30 paralog, while only 50% had a Cyp51A paralog. We created maximum likelihood trees to  
31 investigate the evolution of Cyp51 in Fungi. Our results suggest Cyp51 is present in all fungi  
32 with three paralogs emerging in Pezizomycotina, including Cyp51C which appears to have  
33 diverged from the progenitor of the Cyp51A and Cyp51B groups.

34  
35 **Author Summary**

36 Each year millions of people are infected by a fungal pathogen and receive antifungal treatment  
37 with azole drugs. Resistance to azole drugs is becoming increasingly prevalent and is mostly  
38 caused by mutations in the azole drug target, Cyp51. *Aspergillus fumigatus* is an airborne fungal  
39 pathogen that causes more than 600,000 deaths every year. Azole resistance in *A. fumigatus* is  
40 primarily driven by a promoter repeat coupled with mutations in *cyp51A*. In our study, we found  
41 435 Cyp51 proteins in 4 major groups across Fungi, with some species having multiple Cyp51  
42 proteins (Cyp51, Cyp51A, Cyp51B, and Cyp51C). Although most research in *A. fumigatus* has  
43 focused on Cyp51A, we found Cyp51B in all filamentous Ascomycota fungi showing it is more  
44 conserved than Cyp51A and likely plays a vital role in these fungi.

45

## 46 **Author Summary (Shortened)**

47 Resistance to azole drugs is becoming increasingly prevalent and is mostly caused by mutations  
48 in the azole drug target, Cyp51. Azole resistance in *Aspergillus fumigatus* is primarily driven by  
49 a promoter repeat coupled with mutations in *cyp51A*. We found 435 Cyp51 proteins in 4 major  
50 groups across Fungi, with some species having multiple Cyp51 proteins (Cyp51, Cyp51A,  
51 Cyp51B, and Cyp51C). Although most research focuses on Cyp51A, we found Cyp51B in all  
52 filamentous Ascomycota fungi showing it's more conserved than Cyp51A.

## 53 **Introduction**

54 Fungal pathogens caused over 9 million diagnosed infections in 2017 in the United States, but  
55 the true fungal burden is hard to estimate since many cases are likely undiagnosed [1, 2]. The  
56 infections caused by fungal pathogens include severe chronic conditions, complex chronic  
57 respiratory conditions, recurrent infections, and many life-threatening invasive diseases [3].  
58 Invasive fungal infections generally occur in individuals with suppressed or compromised  
59 immune systems [4]. These infections have a high mortality rate if not treated early with  
60 appropriate antifungal drugs [4]. Major drugs used to treat invasive fungal infections are  
61 echinocandins, polyenes, flucytosine, and azole drugs [5]. Azoles, which target synthesis of the  
62 fungal-specific membrane component ergosterol, are among the most highly used antifungal  
63 drugs.  
64

65 Cyp51 proteins, also known as Erg11 in Ascomycota yeast in the Saccharomycotina and  
66 Taphrinomycotina subphyla, are in all biological kingdoms and are highly conserved [6]. Cyp51  
67 proteins have 6 substrate recognition sites (SRS), an oxygen-binding motif (AGXDTT), PER  
68 and EXXR motifs that create an E-R-R triad within the heme pocket, and a conserved heme-  
69 binding motif (FXXGXXXCXG) (Fig. 1) [7, 8]. Azole drugs competitively bind to sterol 14  
70 alpha-demethylase (Cyp51, Erg11), a cytochrome P450 in the ergosterol biosynthesis pathway in  
71 fungi. Azole drugs consist of a heterocyclic ring with either two (imidazoles) or three (triazoles)  
72 nitrogens and a sidechain. The side chain of azoles interacts with the Cyp51 polypeptide while  
73 the nitrogen in the azole heterocyclic ring interacts directly with the sixth ligand of the heme  
74 ferric ion, a cofactor of the Cyp51 protein [9]. Cytochrome P450 proteins conduct a three-step  
75 reaction within the sterol biosynthesis pathway leading to the production of cholesterol in  
76 animals, sitosterol in plants, and ergosterol in fungi [10, 11]. Sterols are integrated into the cell  
77 membrane where they aid in membrane fluidity and permeability [10]. The binding of azoles to  
78 Cyp51 depletes intracellular ergosterol and causes accumulation of methylated sterols and toxic  
79 intermediate sterols within the fungal cell membrane causing arrested growth and cell membrane  
80 stress [12].  
81

82 Many fungi have acquired mutations in *cyp51* that alter the ability of azoles to bind and inhibit  
83 Cyp51 [13]. Many missense mutations that have been shown to decrease sensitivity to azoles as  
84 determined by minimum inhibitory concentration (MIC) in the human fungal pathogens *Candida*  
85 *albicans*, *Cryptococcus neoformans*, *Histoplasma capsulatum*, and *A. fumigatus* [13-17] occur in  
86 substrate recognition sites causing azoles to interact and bind differently within Cyp51. Increased  
87 expression levels of *cyp51A* due to 34-, 46-, 53- and 120-bp tandem repeats in the promoter have  
88 occurred in *A. fumigatus* leading to high levels of pan-azole resistance, resistance to more than  
89 one azole drug [18-21]. Tandem repeats in the *cyp51A* promoter reduce the affinity of the  
90 promoter and the CGAAT binding complex (CBC), which binds to CGAAT in the promoter and  
91

92 downregulates *cyp51A* expression [22]. Although Cyp51A has been the focus of most studies in  
93 *A. fumigatus*, a second paralog (Cyp51B) has also been documented to cause resistance through  
94 upregulation and missense mutations [23, 24]. Like human pathogens, plant pathogens (such as  
95 *Erysiphe necator*, *Mycosphaerella* spp., *Penicillium digitatum*, *Venturia inaequalis*) undergo  
96 changes in the *cyp51A* promoter (substitutions, insertions, duplications) and/or mutations in  
97 substrate recognition sites to alter expression and binding of Cyp51A [25-34].  
98

99 Filamentous Ascomycota have multiple Cyp51 paralogs that may play different roles in the cell  
100 under normal conditions or under azole stress. The goal of our study was to understand the  
101 evolutionary relationships among fungal Cyp51 proteins.  
102

## 103 Results and Discussion

104 **435 fungal Cyp51 proteins were analyzed.** Cyp51 proteins were previously defined as having 6  
105 substrate recognition sites (SRS), an oxygen-binding motif (AGXDTT), PER and EXXR motifs  
106 that create an E-R-R triad within the heme pocket, and a conserved heme-binding motif  
107 (FXXGXXXCXG) [7, 8] (Fig. 1). To understand Cyp51 genes across Fungi, the *A. fumigatus*  
108 Cyp51A protein was used as a reference in a protein BLAST (Basic Local Alignment Search  
109 Tool) [35]. A total of 4404 protein sequences resulted and were filtered to retain those with  
110 greater than 50% coverage and greater than 30% percent identity to the reference sequence,  
111 resulting in 480 sequences (Supplemental Table 1). The resulting protein sequences were  
112 analyzed for the presence of full length SRS1-6 domains and the four Cyp51 motifs. Of these,  
113 439 proteins had SRS1-6 domains, the oxygen-binding motif AGXDTT, the PER and EXXR  
114 motifs, and the conserved heme-binding motif FXXGXXXCXG (Supplemental Table 1) and  
115 were considered to be functional Cyp51 proteins. Within the 439 Cyp51 proteins, we found 19  
116 fusion proteins in various Ascomycota in which a kinase immediately upstream and Cyp51B  
117 were mistakenly fused in genome processing. According to the Joint Genome Institute (JGI), a  
118 frameshift mutation occurred *in silico* causing the stop codon of the kinase to appear to be  
119 deleted (<https://img.jgi.doe.gov/data-processing.html>). The Cyp51B portions of the fusion  
120 proteins were extracted based on their Cyp51 domains and kept in the analyses. Four Cyp51B  
121 proteins (XP\_007688940.1, XP\_014555703.1, XP\_033384229.1, XP\_018700143.1) were not  
122 included in the analyses due to missing amino acids in SRS1-6 or missing amino acids in  
123 conserved motifs resulting in a total of 435 Cyp51 proteins retained for further analysis.  
124

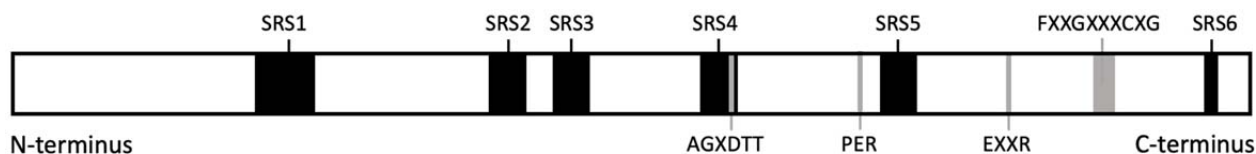

125  
126 **Figure 1: Typical organization of Cyp51 domains.** Cyp51 proteins contain six substrate  
127 recognition sites (SRS 1-6), an oxygen binding motif (AGXDTT), PER and EXXR motifs, and a  
128 conserved heme-binding motif (FXXGXXXCXG). Black boxes represent SRS domains. Gray  
129 shading represents other motifs. Diagram is based on *A. fumigatus* Cyp51A (XP\_752137.1) and  
130 is shown to scale.  
131  
132

133 **Fungal Cyp51 proteins fall into 4 groups.** To understand presence of Cyp51 homologs across  
 134 Fungi, we analyzed 435 Cyp51 proteins (Supplemental Table 2). Most fungal species in our  
 135 study had one or two Cyp51 paralogs (180/295 and 100/295, respectively) (Table 1). Fewer had  
 136 three (14/295) and only one fungus, *Basidiobolus meristosporus*, had four copies of Cyp51  
 137 (Table 1). Fungi with one or two Cyp51 proteins were found across all taxonomic groups (Table  
 138 1). Fungi with three Cyp51 proteins were found in Basidiomycota and Ascomycota. One species  
 139 in Zoopagomycota had four Cyp51 proteins (Table 1). Members in Pezizomycotina had different  
 140 combinations of Cyp51 paralogs (Table 2). Most species had Cyp51A and Cyp51B paralogs or  
 141 only Cyp51B (69/171 and 63/171, respectively) (Table 2). All members of Pezizomycotina  
 142 contained a Cyp51B paralog (Table 2). As shown in Supplemental Table 2, we named fungal  
 143 Cyp51 proteins without a designation in NCBI based on the group assignment in Supplemental  
 144 Figure 1.  
 145

| Major Fungal Taxonomic Clades <sup>1</sup> |                                       | Number of species with various copy numbers of Cyp51 Proteins <sup>2</sup> |                    |                  |                 |
|--------------------------------------------|---------------------------------------|----------------------------------------------------------------------------|--------------------|------------------|-----------------|
|                                            |                                       | 1                                                                          | 2                  | 3                | 4               |
| ■ Blastocladiomycota                       |                                       | -                                                                          | 1                  | -                | -               |
| ■ Chytridiomycota                          |                                       | 4                                                                          | -                  | -                | -               |
| ■ Zoopagomycota                            |                                       | 9                                                                          | 1                  | -                | 1               |
| ■ Mucoromycota                             |                                       | 3                                                                          | 1                  | -                | -               |
| ■ Basidiomycota                            | ■ Ustilaginomycotina                  | 15                                                                         | -                  | -                | -               |
|                                            | ■ Pucciniomycotina                    | 3                                                                          | -                  | -                | -               |
|                                            | ■ Agaricomycotina                     | 25                                                                         | 5                  | 1                | -               |
|                                            | ■ Wallemiomycotina                    | 1                                                                          | 1                  | -                | -               |
| ■ ■ ■ ■ Ascomycota                         | ■ Taphrinomycotina                    | 7                                                                          | -                  | -                | -               |
|                                            | ■ Saccharomycotina                    | 48                                                                         | 2                  | -                | -               |
|                                            | ■ ■ Orbiliomycetes                    | -                                                                          | 1                  | -                | -               |
|                                            | ■ ■ ■ Xylonomycetes                   | -                                                                          | 1                  | -                | -               |
|                                            | ■ ■ ■ ■ Pezizomycotina Eurotiomycetes | 15                                                                         | 61                 | 4                | -               |
|                                            | ■ ■ ■ Lecanoromycetes                 | -                                                                          | 1                  | -                | -               |
|                                            | ■ ■ ■ Dothideomycetes                 | 19                                                                         | 5                  | 1                | -               |
|                                            | ■ ■ ■ Leotiomycetes                   | 9                                                                          | 1                  | -                | -               |
| ■ ■ ■ Sordariomycetes                      | 21                                    | 19                                                                         | 8                  | -                |                 |
| # Species/Total # Species                  |                                       | 180/295<br>(61%)                                                           | 100/295<br>(33.9%) | 14/295<br>(4.7%) | 1/295<br>(0.3%) |

146 **Table 1. Species of Fungi have different numbers of Cyp51 proteins.** Orange, red, black, and  
 147 blue boxes represent the presence of Cyp51, Cyp51A, Cyp51B, and Cyp51C within fungal  
 148 groups, respectively.

149 <sup>1</sup>Major fungal taxonomic clades based on James et al 2020 [36].

150 <sup>2</sup>Based on all fungal Cyp51 proteins identified in NCBI databases (435) as described in methods  
151 and shown in Supplemental Table 2.

152

153

154

**Table 2. Species in Pezizomycotina have different combinations of Cyp51 paralogs.**

| Cyp51 Paralog             | B      | A+B    | B+B   | B+C    | A+B+C | A+A+B | A+B+B | B+C+C |
|---------------------------|--------|--------|-------|--------|-------|-------|-------|-------|
| # Species/Total # Species | 63/171 | 69/171 | 4/171 | 18/171 | 9/171 | 5/171 | 1/171 | 1/171 |

155

156

157 To investigate how fungal Cyp51 proteins are related to each other, we used RAxML to create a  
158 maximum likelihood tree with 435 fungal Cyp51 proteins and 2 human Cyp51 proteins to root  
159 the tree (Supplemental Figure 1). To aid in visualization, we collapsed branches based on phyla,  
160 subphyla or classes (Figure 2). We found fungal Cyp51 proteins fell into four major groups  
161 which we designated as Cyp51, Cyp51A, Cyp51B, and Cyp51C based on naming in previous  
162 literature (Figure 2, Supplemental Figure 1). Cyp51 in members of Saccharomycotina and  
163 Taphrinomycotina are also known as “Erg11” in the literature. The topology of our Cyp51  
164 protein tree largely followed the topology of the fungal tree of life (Figure 2, Supplemental  
165 Figure 1, [36]). Proteins from early-diverging fungi (Blastocladiomycota, Chytridiomycota,  
166 Zoopagomycota and Mucormycota), Basidiomycota, Saccharomycotina, and Taphrinomycotina  
167 fell into group Cyp51. Our phylogenetic analyses show a divergence of three Cyp51 paralogs in  
168 filamentous Ascomycota (Figure 2, Supplemental Figure 1). Those from Pezizomycotina fell  
169 into Cyp51A, Cyp51B, and Cyp51C. Divergence of Cyp51 from the common ancestor of  
170 paralogs Cyp51A, Cyp51B and Cyp51C has strong support (100% bootstrap support), but  
171 divergence of paralogs Cyp51A, Cyp51B and Cyp51C from each other does not have strong  
172 support (41%, 36%, and 41% bootstrap support, respectively).

173



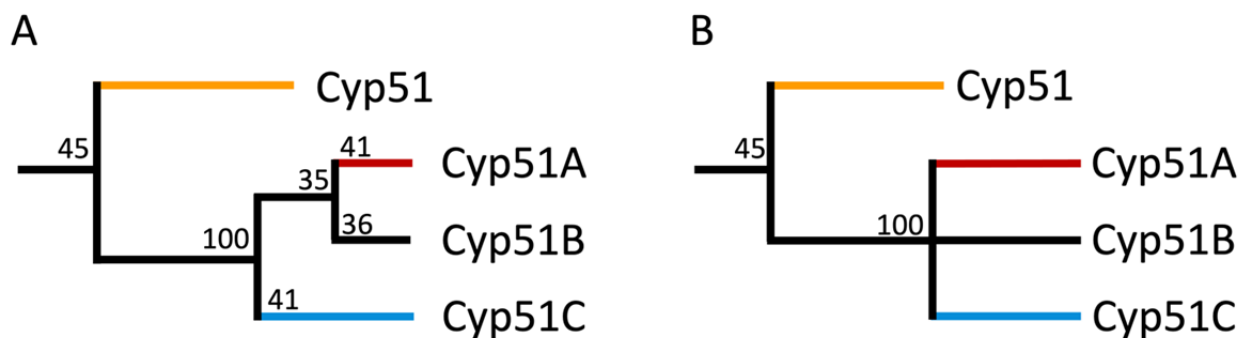

188  
189 **Figure 3. Possible Cyp51 homolog evolutionary paths.** Simplified diagrams of possible Cyp51  
190 evolutionary paths based on Figure 2. The Cyp51 branch in early diverging fungi,  
191 Basidiomycota, Saccharomycotina and Taphrinomycotina is colored orange. Filamentous  
192 Ascomycota (Pezizomycotina) Cyp51A, Cyp51B, and Cyp51C branches are colored red, black  
193 and blue, respectively. Numbers represent bootstrap support.  
194

195  
196 We postulate two possible evolutionary paths for Cyp51 paralogs as shown in Figure 3. In the  
197 first possible evolutionary path, shown in 3A, after an initial Cyp51 duplication paralog C  
198 diverged followed by another duplication event and divergence of paralogs A and B. The  
199 divergence of paralogs A (41%), B (36%), and C (41%) has low support. In the second possible  
200 evolutionary path, shown in 3B, the poorly supported nodes are removed so that the three  
201 paralogs diverged after two unresolved duplication events or a triplication event placing them on  
202 the same branch. In either scenario it is possible that subsequent gene loss(es) or duplication(s)  
203 led to species with the different combinations of paralogs shown in Table 2.  
204

205 Distinguishing between these possible evolutionary paths is complicated by the small number of  
206 Cyp51C sequences and the relatively low number of characters (414-624 amino acids in Cyp51  
207 genes) resulting in low bootstrap support for some nodes. Our analysis only had 29 Cyp51C  
208 sequences compared to Cyp51A and B with 87 and 171 sequences, respectively. To see if we  
209 could better resolve the relationships among Cyp51A, Cyp51B, and Cyp51C, we analyzed  
210 pairwise conservation of all Cyp51 protein sequences using Geneious Prime (Supplemental  
211 Table 3). We found that individual members of the Cyp51 group varied the most from each  
212 other, with only 46% similarity. Similarity within the Cyp51A, Cyp51B, and Cyp51C groups  
213 was much higher (64.7%-68.8%). Comparing between groups, members of the Cyp51 group  
214 were 45-50% similar to members of Cyp51A, Cyp51B, or Cyp51C groups while members of  
215 Cyp51A, Cyp51B, and Cyp51C groups were roughly 60% similar to each other. , (Supplemental  
216 Table 3). We then examined conservation within the highly conserved motifs (SRS 1-6,  
217 AGXDTT, PER, EXXR and FXXGXXXCXG) (Supplemental Table 4). Once more the general  
218 trend was that motifs within the Cyp51 group were more variable than those in other groups. .  
219

220 Consensus sequences from the four Cyp51 groups were compared to each other to create a visual  
221 representation of differences in motifs across groups (Figure 4, Supplemental Table 4).  
222 The most conserved regions (>95% across all Cyp51 proteins) are in the EXXR, PER, and  
223 FXXGXXXCIG motifs (Figure 4, Supplemental Table 4). These three motifs are presumably  
224 highly conserved due to their roles in Cyp51 structure and function. The EXXR and PER motif  
225 form the E-R-R triad that stabilizes the core structure of Cyp51, while the FXXGXXXCIG motif

226 is a heme-binding domain that is essential for Cyp51 function [37, 38]. Out of the 17 amino acids  
227 within these three motifs, 13 are more than 95% conserved (Figure 4, Supplemental Table 4).  
228 Looking at all motifs, there are 59 amino acids shared between the four consensus sequences  
229 with 39 having greater than 95% conservation (Figure 4, Supplemental Table 4). Cyp51A and  
230 Cyp51B have the highest amount of shared amino acids in motifs (88%) (Figure 4, Supplemental  
231 Table 4). Cyp51C has 23 amino acids across motifs that are unique compared to 15 in Cyp51, 8  
232 in Cyp51A, and 5 in Cyp51B, suggesting Cyp51C may be a specialized group, though the low  
233 number of Cyp51C sequences included in the analysis might also explain the pattern (Figure 4).



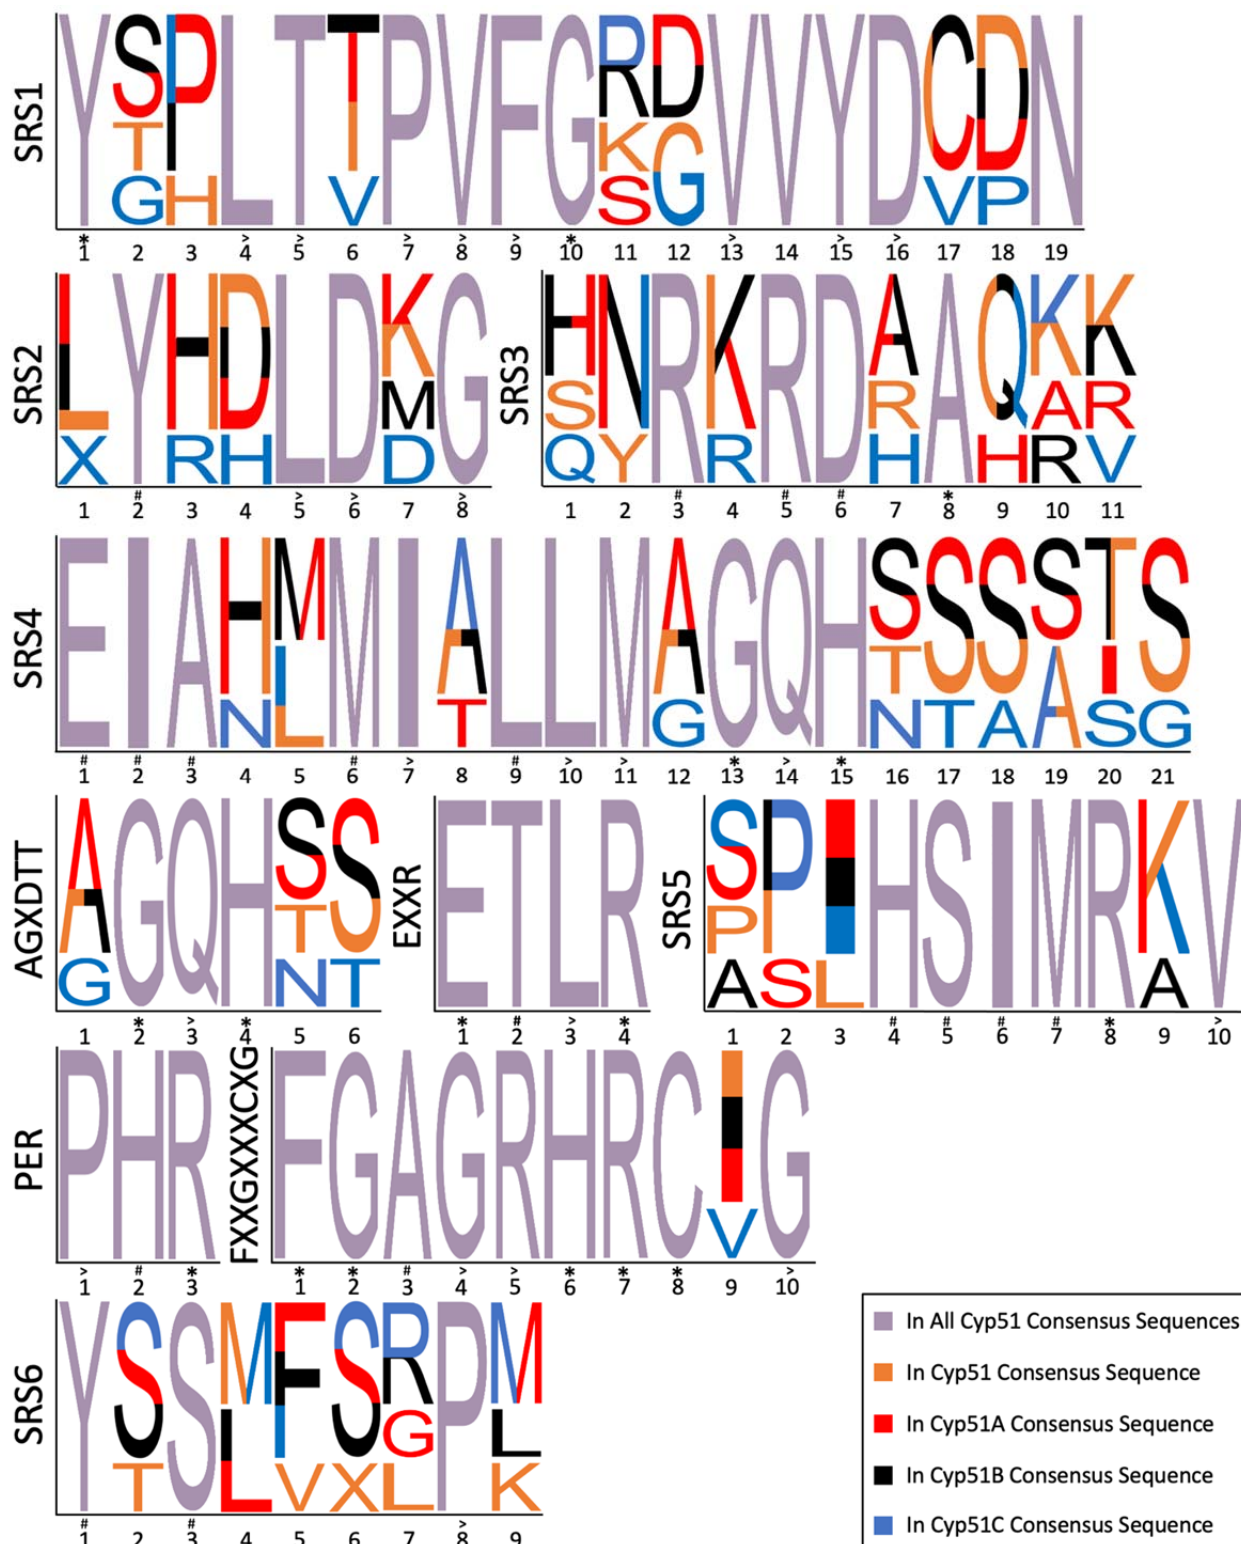

234  
235  
236  
237

**Figure 4. Conservation of motifs in Cyp51 proteins across Fungi.** Consensus sequences for each of the four Cyp51A groups are shown arranged from the N- to C-terminus. Amino acids conserved across all 435 Cyp51 protein sequences are denoted by an \*. Amino acids found in

238 more than 95% of all Cyp51s are denoted by >. Lower than 95% conservation in all Cyp51s are  
239 denoted by #. Numbers represent amino acid position within motifs.

240

241

242 Research on Cyp51 in filamentous Ascomycota tends to be focused on the Cyp51A paralog  
243 because of its role in azole resistance in fungal pathogens of plants and animals. To our surprise,  
244 we found Cyp51A in only half of the species of filamentous Ascomycota we analyzed (86/171)  
245 and Cyp51B in all species of filamentous Ascomycota (Table 2, Supplemental Table 2). The low  
246 bootstrap support we saw for divergence of Cyp51A from Cyp51B suggests they may play very  
247 similar roles with Cyp51B being the essential paralog and the possible Cyp51 ortholog (Figure  
248 3A). Indeed, in *A. fumigatus*, Cyp51A and Cyp51B act in a compensatory manner; when one  
249 paralog is knocked out expression of the other paralog increases [39]. Our results confirm and  
250 expand previous work by Hawkins et al [28] that compared 86 fungal Cyp51 proteins in 50  
251 different species and found all species of filamentous Ascomycota retained a Cyp51B paralog,  
252 but Cyp51A had been lost in multiple lineages, and Cyp51C was only found in *Fusarium* spp.  
253 [40-42]. [40, 41]. ). Cyp51C was subsequently reported in *Fusarium* spp., *Gibberella zeae*, and  
254 *Nectria haematococca* [40, 41]. We found Cyp51C in 9 other genera (Supplemental Table 2).  
255 Interestingly, all are pathogens of plants or animals (Supplemental Table 2). Cyp51C has been  
256 shown to be necessary for invasion of plant host tissues in *Fusarium* [43]. This raises the  
257 interesting possibility that it could play a similar role in other genera, though further functional  
258 studies are needed to test the role of Cyp51C in invasion and virulence.

259

260 Maximum likelihood analysis suggested two possible evolutionary paths for Cyp51 paralogs: 1)  
261 Cyp51C diverged before Cyp51A and Cyp51B (Figure 3A; 2) Cyp51A, Cyp51B, and Cyp51C  
262 diverged from each other at the same time (Figure 3B). Based on the higher amino acid  
263 conservation between Cyp51A and Cyp51B, the evolutionary path shown in Figure 3A seems  
264 more likely; that is to say Cyp51C is a specialized group of proteins that diverged first (Figure  
265 3A, Figure 4, Supplemental Table 4). More functional studies are needed to understand shared  
266 and unique roles Cyp51A, Cyp51B, and Cyp51C paralogs play in fungi.

267

268

269

270

## 271 **Materials and Methods**

### 272 **NCBI Protein Blast**

273 Cyp51 protein sequences (XP\_006955920.1, XP\_016612382.1, XP\_025190100.1,  
274 XP\_01661282.1, XP\_018263285.1, XP\_752137.1, XP\_018249823.1, XP\_018226934.1,  
275 XP\_015469227.1) were used in an NCBI Protein Blast to search the reference sequence database  
276 for other Cyp51 proteins in Fungi (Supplemental Table 1). The following settings were used for  
277 the Protein BLAST: Database: Reference Proteins, Exclude: uncultured/environmental sample  
278 sequences, Algorithm: blastp (protein-protein BLAST), Max Target Sequences: 1000, Expect  
279 Threshold: 0.001, Word size: 6, Max matches in a query range: 0, Matrix: BLOSUM62, Gap  
280 Costs: Existence: 11 Extension: 1, and Compositional adjustments: Conditional compositional  
281 score matrix adjustment. Some clades were not represented in the reference sequence database,  
282 so identical settings were used to search the non-redundant proteins sequences database. The

283 unfiltered searches resulted in a total of 4404 sequence hits. Sequences with less than 50%  
284 coverage and less than 30% percent identity were eliminated. FASTA files of the 480 sequences  
285 resulting from filtering were downloaded and opened in Geneious Prime 2019.1.1. To confirm  
286 the sequences were a Cyp51, sequences were checked for the presence of SRS1-6, the oxygen-  
287 binding motif AGXDTT, PER and EXXR motifs, and the conserved FXXGXXXCXG heme-  
288 binding domain.  
289 The following sequences were eliminated for missing amino acids in SRS1-6 or missing amino  
290 acids in conserved motifs: EPZ30787.1, EPZ31936.1, KXN68292.1, RKP07181.1, RKP16598.1,  
291 RKP17874.1, RKP18653.1, RKP18926.1, XP\_001218650.1, XP\_002563403.1,  
292 XP\_002583031.1, XP\_002842283.1, XP\_003005233.1, XP\_003325369.2, XP\_007375289.1,  
293 XP\_007756389.1, XP\_007802603.1, XP\_008039623.1, XP\_009649122.1, XP\_013258864.1,  
294 XP\_015404015.1, XP\_018230821.1, XP\_018249826.1, XP\_018270027.1, XP\_018712692.1,  
295 XP\_020066776.1, XP\_022578172.1, XP\_025599710.1, XP\_027619241.1, XP\_027619242.1,  
296 XP\_031034290.1, XP\_031059536.1, ORZ32486.1, XP\_017991977.1, XP\_003017020.1,  
297 XP\_003019064.1, and XP\_033461214.1. The following 19 fusion proteins were found in various  
298 members in Ascomycota: XP\_022511803.1, XP\_013278994.1, XP\_024670717.1,  
299 XP\_031899359.1, XP\_031927262.1, XP\_026621438.1, XP\_025554838.1, XP\_018192447.1,  
300 XP\_031935516.1, XP\_025433272.1, XP\_015404994.1, XP\_024709601.1, XP\_007688940.1,  
301 XP\_014073145.1, XP\_025394250.1, XP\_014555703.1, XP\_007712864.1, XP\_033384229.1,  
302 XP\_018700143.1. Four fusions (XP\_007688940.1, XP\_014555703.1, XP\_033384229.1,  
303 XP\_018700143.1) were not included in the analyses due to missing amino acids in SRS1-6 or  
304 missing amino acids in conserved motifs. *Aspergillus flavus* contained three Cyp51 proteins, but  
305 were later identified to be contaminated with foreign sequence by NCBI  
306 ([https://www.ncbi.nlm.nih.gov/protein/XP\\_002375123.1/](https://www.ncbi.nlm.nih.gov/protein/XP_002375123.1/)) and were removed (XP\_002375123.1  
307 , XP\_002379130.1, XP\_002383931.1).

308

### 309 **Phylogenetic analyses**

310 Protein sequences were aligned once with MAFFT version 7.407 then once with PASTA version  
311 1.8.5 [44, 45]. Maximum likelihood trees were constructed with RAxML version 8.2.11 with a  
312 PROTGAMMAAUTO or GTRGAMMA substitution model and 1000 bootstraps [46].  
313 Interactive Tree of Life (iTOL) was used for visualization and annotation of the trees [47].

314

### 315 **Amino Acid Analyses**

316 Geneious Prime (version 2021.2.2) was used to generate pairwise identities and consensus  
317 sequences. Similarity tables for the whole protein and motifs are based on pairwise identity in  
318 each group, number of similar amino acids divided by the total number of amino acids in the  
319 protein or motif. “Weblogo-like” diagrams were created manually for visualization of  
320 conservation across groups. The height of one letter amino acid designation was based on  
321 frequency across all four consensus sequences. Colors and symbols were used as described in  
322 Figure 4 legend to denote conservation within groups.

323

### 324 **Data availability**

325 All Cyp51 sequences used are listed in Supplementary Table 2 and are publicly available through  
326 NCBI (<https://www.ncbi.nlm.nih.gov/>).

327

328

329 **Funding**

330 This work was supported by the Centers for Disease Control and Prevention (CDC; contract 200-  
331 2017-96199 to M.M. and M.T.B.) and United States Department of Agriculture, National  
332 Institute of Food and Agriculture (USDA NIFA AFRI grant 2019-67017-29113 to M.T.B. and  
333 M.M.). B.N.C-S. was also supported by the National Science Foundation under Grant No. DGE-  
334 1545433.

335

336 **Conflicts of interest**

337 The authors declare that there is no conflict of interest.

338

339 **References**

- 340 1. Benedict K, Jackson BR, Chiller T, Beer KD. Estimation of Direct Healthcare Costs of  
341 Fungal Diseases in the United States. *Clin Infect Dis*. 2019;68(11):1791-7. Epub 2018/09/12.  
342 doi: 10.1093/cid/ciy776. PubMed PMID: 30204844; PubMed Central PMCID:  
343 PMC6409199.
- 344 2. Vallabhaneni S, Mody RK, Walker T, Chiller T. The Global Burden of Fungal Diseases.  
345 *Infect Dis Clin North Am*. 2016;30(1):1-11. Epub 2016/01/08. doi: 10.1016/j.idc.2015.10.004.  
346 PubMed PMID: 26739604.
- 347 3. Perlin DS, Rautemaa-Richardson R, Alastruey-Izquierdo A. The global problem of  
348 antifungal resistance: prevalence, mechanisms, and management. *Lancet Infect Dis*.  
349 2017;17(12):e383-e92. Epub 2017/08/05. doi: 10.1016/S1473-3099(17)30316-X. PubMed  
350 PMID: 28774698.
- 351 4. Brown GD, Denning DW, Gow NA, Levitz SM, Netea MG, White TC. Hidden killers:  
352 human fungal infections. *Sci Transl Med*. 2012;4(165):165rv13. doi:  
353 10.1126/scitranslmed.3004404. PubMed PMID: 23253612.
- 354 5. Pound MW, Townsend ML, Dimondi V, Wilson D, Drew RH. Overview of treatment  
355 options for invasive fungal infections. *Med Mycol*. 2011;49(6):561-80. Epub 2011/03/04. doi:  
356 10.3109/13693786.2011.560197. PubMed PMID: 21366509.
- 357 6. Lepesheva GI, Waterman MR. Structural basis for conservation in the CYP51 family.  
358 *Biochim Biophys Acta*. 2011;1814(1):88-93. Epub 2010/06/16. doi:  
359 10.1016/j.bbapap.2010.06.006. PubMed PMID: 20547249; PubMed Central PMCID:  
360 PMC2962772.
- 361 7. Lepesheva GI, Waterman MR. Sterol 14alpha-demethylase cytochrome P450 (CYP51), a  
362 P450 in all biological kingdoms. *Biochim Biophys Acta*. 2007;1770(3):467-77. Epub  
363 2006/09/12. doi: 10.1016/j.bbagen.2006.07.018. PubMed PMID: 16963187; PubMed Central  
364 PMCID: PMC2324071.
- 365 8. Cordova P, Gonzalez AM, Nelson DR, Gutierrez MS, Baeza M, Cifuentes V, et al.  
366 Characterization of the cytochrome P450 monooxygenase genes (P450ome) from the  
367 carotenogenic yeast *Xanthophyllomyces dendrorhous*. *BMC Genomics*. 2017;18(1):540. Epub  
368 2017/07/21. doi: 10.1186/s12864-017-3942-9. PubMed PMID: 28724407; PubMed Central  
369 PMCID: PMC5516332.
- 370 9. Jefcoate CR, Gaylor JL, Calabrese RL. Ligand interactions with cytochrome P-450. I.  
371 Binding of primary amines. *Biochemistry*. 1969;8(8):3455-63. Epub 1969/08/01. doi:  
372 10.1021/bi00836a049. PubMed PMID: 5809236.

- 373 10. Dufourc EJ. Sterols and membrane dynamics. *J Chem Biol.* 2008;1(1-4):63-77. Epub  
374 2009/07/02. doi: 10.1007/s12154-008-0010-6. PubMed PMID: 19568799; PubMed Central  
375 PMCID: PMCPMC2698314.
- 376 11. Schaller H. The role of sterols in plant growth and development. *Prog Lipid Res.*  
377 2003;42(3):163-75. Epub 2003/04/12. doi: 10.1016/s0163-7827(02)00047-4. PubMed PMID:  
378 12689617.
- 379 12. Cowen LE, Steinbach WJ. Stress, drugs, and evolution: the role of cellular signaling in  
380 fungal drug resistance. *Eukaryot Cell.* 2008;7(5):747-64. Epub 2008/04/01. doi:  
381 10.1128/EC.00041-08. PubMed PMID: 18375617; PubMed Central PMCID:  
382 PMCPMC2394973.
- 383 13. Flowers SA, Colon B, Whaley SG, Schuler MA, Rogers PD. Contribution of clinically  
384 derived mutations in ERG11 to azole resistance in *Candida albicans*. *Antimicrob Agents*  
385 *Chemother.* 2015;59(1):450-60. Epub 2014/11/12. doi: 10.1128/AAC.03470-14. PubMed PMID:  
386 25385095; PubMed Central PMCID: PMCPMC4291385.
- 387 14. Rodero L, Mellado E, Rodriguez AC, Salve A, Guelfand L, Cahn P, et al. G484S amino  
388 acid substitution in lanosterol 14-alpha demethylase (ERG11) is related to fluconazole resistance  
389 in a recurrent *Cryptococcus neoformans* clinical isolate. *Antimicrob Agents Chemother.*  
390 2003;47(11):3653-6. Epub 2003/10/25. doi: 10.1128/AAC.47.11.3653-3656.2003. PubMed  
391 PMID: 14576140; PubMed Central PMCID: PMCPMC253790.
- 392 15. Sionov E, Chang YC, Garraffo HM, Dolan MA, Ghannoum MA, Kwon-Chung KJ.  
393 Identification of a *Cryptococcus neoformans* cytochrome P450 lanosterol 14alpha-demethylase  
394 (Erg11) residue critical for differential susceptibility between fluconazole/voriconazole and  
395 itraconazole/posaconazole. *Antimicrob Agents Chemother.* 2012;56(3):1162-9. Epub  
396 2011/12/14. doi: 10.1128/AAC.05502-11. PubMed PMID: 22155829; PubMed Central PMCID:  
397 PMCPMC3294891.
- 398 16. Wheat LJ, Connolly P, Smedema M, Durkin M, Brizendine E, Mann P, et al. Activity of  
399 newer triazoles against *Histoplasma capsulatum* from patients with AIDS who failed  
400 fluconazole. *J Antimicrob Chemother.* 2006;57(6):1235-9. Epub 2006/04/22. doi:  
401 10.1093/jac/dkl133. PubMed PMID: 16627592.
- 402 17. Lockhart SR, Frade JP, Etienne KA, Pfaller MA, Diekema DJ, Balajee SA. Azole  
403 resistance in *Aspergillus fumigatus* isolates from the ARTEMIS global surveillance study is  
404 primarily due to the TR/L98H mutation in the *cyp51A* gene. *Antimicrob Agents Chemother.*  
405 2011;55(9):4465-8. Epub 2011/06/22. doi: 10.1128/AAC.00185-11. PubMed PMID: 21690285;  
406 PubMed Central PMCID: PMCPMC3165364.
- 407 18. Snelders E, van der Lee HA, Kuijpers J, Rijs AJ, Varga J, Samson RA, et al. Emergence  
408 of azole resistance in *Aspergillus fumigatus* and spread of a single resistance mechanism. *PLoS*  
409 *Med.* 2008;5(11):e219. Epub 2008/11/13. doi: 10.1371/journal.pmed.0050219. PubMed PMID:  
410 18998768; PubMed Central PMCID: PMCPMC2581623.
- 411 19. Snelders E, Karawajczyk A, Schaftenaar G, Verweij PE, Melchers WJ. Azole resistance  
412 profile of amino acid changes in *Aspergillus fumigatus* CYP51A based on protein homology  
413 modeling. *Antimicrob Agents Chemother.* 2010;54(6):2425-30. Epub 2010/04/14. doi:  
414 10.1128/AAC.01599-09. PubMed PMID: 20385860; PubMed Central PMCID:  
415 PMCPMC2876375.
- 416 20. Hodiamont CJ, Dolman KM, Ten Berge IJ, Melchers WJ, Verweij PE, Pajkrt D.  
417 Multiple-azole-resistant *Aspergillus fumigatus* osteomyelitis in a patient with chronic  
418 granulomatous disease successfully treated with long-term oral posaconazole and surgery. *Med*

- 419 Mycol. 2009;47(2):217-20. Epub 2008/12/23. doi: 10.1080/13693780802545600. PubMed  
420 PMID: 19101840.
- 421 21. Hare RK, Gertsen JB, Astvad KMT, Degn KB, Lokke A, Stegger M, et al. In Vivo  
422 Selection of a Unique Tandem Repeat Mediated Azole Resistance Mechanism (TR120) in  
423 *Aspergillus fumigatus* cyp51A, Denmark. *Emerg Infect Dis.* 2019;25(3):577-80. Epub  
424 2019/02/23. doi: 10.3201/eid2503.180297. PubMed PMID: 30789127; PubMed Central PMCID:  
425 PMCPMC6390761.
- 426 22. Gsaller F, Hortschansky P, Furukawa T, Carr PD, Rash B, Capilla J, et al. Sterol  
427 Biosynthesis and Azole Tolerance Is Governed by the Opposing Actions of SrbA and the  
428 CCAAT Binding Complex. *PLoS Pathog.* 2016;12(7):e1005775. Epub 2016/07/22. doi:  
429 10.1371/journal.ppat.1005775. PubMed PMID: 27438727; PubMed Central PMCID:  
430 PMCPMC4954732.
- 431 23. Buied A, Moore CB, Denning DW, Bowyer P. High-level expression of cyp51B in azole-  
432 resistant clinical *Aspergillus fumigatus* isolates. *J Antimicrob Chemother.* 2013;68(3):512-4.  
433 Epub 2012/12/05. doi: 10.1093/jac/dks451. PubMed PMID: 23208831.
- 434 24. Gonzalez-Jimenez I, Lucio J, Amich J, Cuesta I, Sanchez Arroyo R, Alcazar-Fuoli L, et  
435 al. A Cyp51B Mutation Contributes to Azole Resistance in *Aspergillus fumigatus*. *J Fungi*  
436 (Basel). 2020;6(4). Epub 2020/12/02. doi: 10.3390/jof6040315. PubMed PMID: 33255951;  
437 PubMed Central PMCID: PMCPMC7712412.
- 438 25. Ghosop JM, Schmidt LS, Margosan DA, Smilanick JL. Imazalil resistance linked to a  
439 unique insertion sequence in the PdCYP51 promoter region of *Penicillium digitatum*. *Postharvest*  
440 *Biol Tec.* 2007;44(1):9-18. doi: 10.1016/j.postharvbio.2006.11.008. PubMed PMID:  
441 WOS:000245490200002.
- 442 26. Delye C, Laigret F, CorioCostet MF. A mutation in the 14 alpha-demethylase gene of  
443 *Uncinula necator* that correlates with resistance to a sterol biosynthesis inhibitor. *Appl Environ*  
444 *Microb.* 1997;63(8):2966-70. PubMed PMID: WOS:A1997XP06700002.
- 445 27. Gadoury DM, Cadle-Davidson L, Wilcox WF, Dry IB, Seem RC, Milgroom MG.  
446 Grapevine powdery mildew (*Erysiphe necator*): a fascinating system for the study of the biology,  
447 ecology and epidemiology of an obligate biotroph. *Mol Plant Pathol.* 2012;13(1):1-16. doi:  
448 10.1111/j.1364-3703.2011.00728.x. PubMed PMID: WOS:000298088200001.
- 449 28. Stammler G, Cordero J, Koch A, Semar M, Schlehner S. Role of the Y134F mutation in  
450 cyp51 and overexpression of cyp51 in the sensitivity response of *Puccinia triticina* to  
451 epoxiconazole. *Crop Prot.* 2009;28(10):891-7. doi: 10.1016/j.cropro.2009.05.007. PubMed  
452 PMID: WOS:000270123900015.
- 453 29. Canas-Gutierrez GP, Angarita-Velasquez MJ, Restrepo-Florez JM, Rodriguez P, Moreno  
454 CX, Arango R. Analysis of the CYP51 gene and encoded protein in propiconazole-resistant  
455 isolates of *Mycosphaerella fijiensis*. *Pest Manag Sci.* 2009;65(8):892-9. doi: 10.1002/ps.1770.  
456 PubMed PMID: WOS:000268442600010.
- 457 30. Cools HJ, Fraaije BA. Update on mechanisms of azole resistance in *Mycosphaerella*  
458 *graminicola* and implications for future control. *Pest Manag Sci.* 2013;69(2):150-5. Epub  
459 2012/06/26. doi: 10.1002/ps.3348. PubMed PMID: 22730104.
- 460 31. Cools HJ, Bayon C, Atkins S, Lucas JA, Fraaije BA. Overexpression of the sterol  
461 14alpha-demethylase gene (MgCYP51) in *Mycosphaerella graminicola* isolates confers a novel  
462 azole fungicide sensitivity phenotype. *Pest Manag Sci.* 2012;68(7):1034-40. Epub 2012/03/14.  
463 doi: 10.1002/ps.3263. PubMed PMID: 22411894.

- 464 32. Sun XP, Xu Q, Ruan RX, Zhang TY, Zhu CY, Li HY. PdMLE1, a specific and active  
465 transposon acts as a promoter and confers *Penicillium digitatum* with DMI resistance. *Env*  
466 *Microbiol Rep.* 2013;5(1):135-42. doi: 10.1111/1758-2229.12012. PubMed PMID:  
467 WOS:000314474500016.
- 468 33. Schnabel G, Jones AL. The 14 alpha-demethylase (CYP51A1) gene is overexpressed in  
469 *Venturia inaequalis* strains resistant to myclobutanil. *Phytopathology.* 2001;91(1):102-10. doi:  
470 Doi 10.1094/Phyto.2001.91.1.102. PubMed PMID: WOS:000166027300011.
- 471 34. Pfeufer EE, Ngugi HK. Orchard Factors Associated with Resistance and Cross  
472 Resistance to Sterol Demethylation Inhibitor Fungicides in Populations of *Venturia inaequalis*  
473 from Pennsylvania. *Phytopathology.* 2012;102(3):272-82. doi: 10.1094/Phyto-04-11-0117.  
474 PubMed PMID: WOS:000300044100005.
- 475 35. Altschul SF, Gish W, Miller W, Myers EW, Lipman DJ. Basic local alignment search  
476 tool. *J Mol Biol.* 1990;215(3):403-10. Epub 1990/10/05. doi: 10.1016/S0022-2836(05)80360-2.  
477 PubMed PMID: 2231712.
- 478 36. James TY, Stajich JE, Hittinger CT, Rokas A. Toward a Fully Resolved Fungal Tree of  
479 Life. *Annu Rev Microbiol.* 2020;74:291-313. Epub 2020/07/15. doi: 10.1146/annurev-micro-  
480 022020-051835. PubMed PMID: 32660385.
- 481 37. Sezutsu H, Le Goff G, Feyereisen R. Origins of P450 diversity. *Philos T R Soc B.*  
482 2013;368(1612). doi: ARTN 20120428  
483 10.1098/rstb.2012.0428. PubMed PMID: WOS:000313343600002.
- 484 38. Deng JX, Carbone I, Dean RA. The evolutionary history of Cytochrome P450 genes in  
485 four filamentous Ascomycetes. *Bmc Evol Biol.* 2007;7. doi: Artn 30  
486 10.1186/1471-2148-7-30. PubMed PMID: WOS:000244937100001.
- 487 39. Roundtree MT, Juvvadi PR, Shwab EK, Cole DC, Steinbach WJ. *Aspergillus fumigatus*  
488 *Cyp51A* and *Cyp51B* Proteins Are Compensatory in Function and Localize Differentially in  
489 Response to Antifungals and Cell Wall Inhibitors. *Antimicrob Agents Chemother.* 2020;64(10).  
490 Epub 2020/07/15. doi: 10.1128/AAC.00735-20. PubMed PMID: 32660997; PubMed Central  
491 PMCID: PMCPMC7508596.
- 492 40. Becher R, Weihmann F, Deising HB, Wirsal SG. Development of a novel multiplex  
493 DNA microarray for *Fusarium graminearum* and analysis of azole fungicide responses. *BMC*  
494 *Genomics.* 2011;12:52. Epub 2011/01/25. doi: 10.1186/1471-2164-12-52. PubMed PMID:  
495 21255412; PubMed Central PMCID: PMCPMC3037902.
- 496 41. Hawkins NJ, Cools HJ, Sierotzki H, Shaw MW, Knogge W, Kelly SL, et al. Paralog re-  
497 emergence: a novel, historically contingent mechanism in the evolution of antimicrobial  
498 resistance. *Mol Biol Evol.* 2014;31(7):1793-802. Epub 2014/04/16. doi:  
499 10.1093/molbev/msu134. PubMed PMID: 24732957; PubMed Central PMCID:  
500 PMCPMC4069618.
- 501 42. James JE, Lamping E, Santhanam J, Milne TJ, Abd Razak MF, Zakaria L, et al. A 23 bp  
502 *cyp51A* Promoter Deletion Associated With Voriconazole Resistance in Clinical and  
503 Environmental Isolates of *Neocosmospora keratoplastica*. *Front Microbiol.* 2020;11:272. Epub  
504 2020/04/17. doi: 10.3389/fmicb.2020.00272. PubMed PMID: 32296397; PubMed Central  
505 PMCID: PMCPMC7136401.
- 506 43. Fan J, Urban M, Parker JE, Brewer HC, Kelly SL, Hammond-Kosack KE, et al.  
507 Characterization of the sterol 14alpha-demethylases of *Fusarium graminearum* identifies a novel  
508 genus-specific CYP51 function. *New Phytol.* 2013;198(3):821-35. Epub 2013/02/28. doi:  
509 10.1111/nph.12193. PubMed PMID: 23442154.

- 510 44. Katoh K, Standley DM. MAFFT multiple sequence alignment software version 7:  
511 improvements in performance and usability. *Mol Biol Evol.* 2013;30(4):772-80. Epub  
512 2013/01/19. doi: 10.1093/molbev/mst010. PubMed PMID: 23329690; PubMed Central PMCID:  
513 PMCPMC3603318.
- 514 45. Mirarab S, Nguyen N, Guo S, Wang LS, Kim J, Warnow T. PASTA: Ultra-Large  
515 Multiple Sequence Alignment for Nucleotide and Amino-Acid Sequences. *J Comput Biol.*  
516 2015;22(5):377-86. Epub 2014/12/31. doi: 10.1089/cmb.2014.0156. PubMed PMID: 25549288;  
517 PubMed Central PMCID: PMCPMC4424971.
- 518 46. Stamatakis A. RAxML version 8: a tool for phylogenetic analysis and post-analysis of  
519 large phylogenies. *Bioinformatics.* 2014;30(9):1312-3. Epub 2014/01/24. doi:  
520 10.1093/bioinformatics/btu033. PubMed PMID: 24451623; PubMed Central PMCID:  
521 PMCPMC3998144.
- 522 47. Letunic I, Bork P. Interactive Tree Of Life (iTOL) v4: recent updates and new  
523 developments. *Nucleic Acids Res.* 2019;47(W1):W256-W9. Epub 2019/04/02. doi:  
524 10.1093/nar/gkz239. PubMed PMID: 30931475; PubMed Central PMCID: PMCPMC6602468.  
525
